# Supplementary material for: Prickle isoform participation in distinct polarization events in the Drosophila eye
Source: PubMed Central journal article supplement (PMC8836327; doi:10.1371/journal.pone.0262328), 2022-02-11

1: w1118

2: pk<sup>20</sup>

3: sple<sup>1</sup>

4: PK-sple<sup>13</sup>

5: Awt5L > PKΔUDRC

6: Awt5L > GFP-sple

[eye discs]

original image for  
Fig 7A, anti-Pk[C]

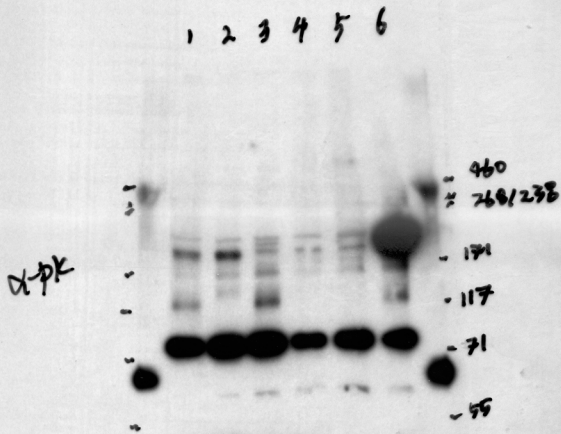

original image for Fig 7B, anti-Arm

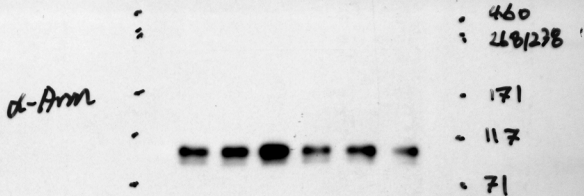

original image Fig 7B, anti-Pk[C]  
36 and 40 hours

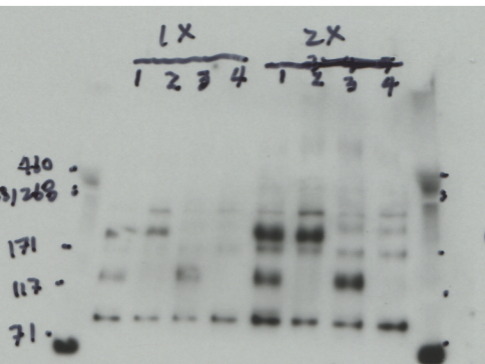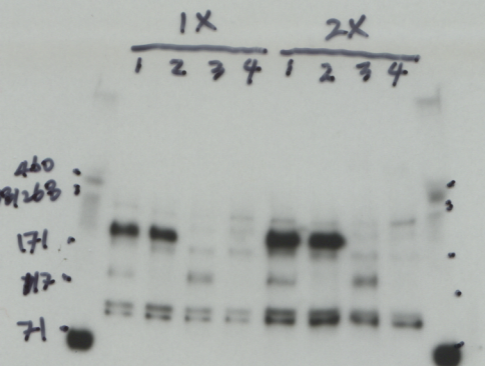

original images Fig 7B, lower portions  
of filters cut and probed with anti-tub.

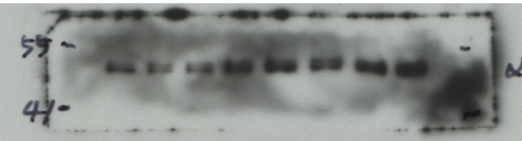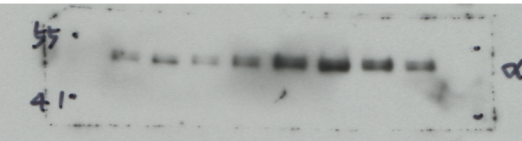

original image Fig 6-2B, cut and upper portion probed with anti-Pk[C], lower with anti-tub

- 1: w1118
- 2: pk-sple CRISPR #2
- 3: " #5
- 4: w1118
- 5: pk<sup>M null</sup> #2
- 6: " #7
- 7: pk-sple CRISPR #2
- 8: " #5
- 9: pk-sple<sup>13</sup>

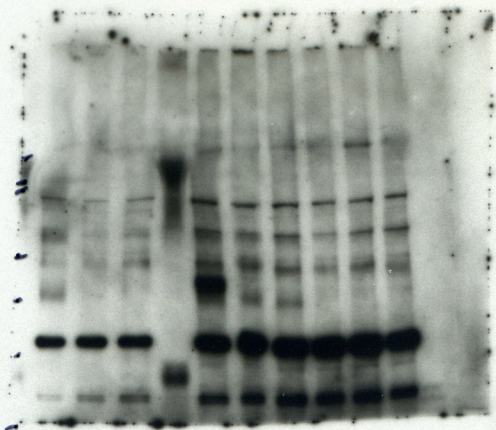

1 2 3      4 5 6 7 8 9  
-----  
eye                  Brain

α-Tub

original image Fig 6-2C, probed with anti-HA. Lane marked with red X expressed a smaller HA-tagged protein as a control and was cropped out

$\alpha$ -HA

X

1: HA (+)

2: W1118

3: HA-pKM #1

4: HA-pKM #7

1 2 3 4

- 1: HA(+)
- 2: W1118
- 3: HA-PKM #1
- 4: HA-PKM #7

original image Fig 6-2C  
probed with anti-Pk[C]

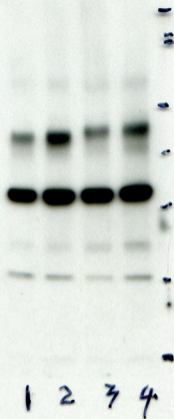

Supplement: pone.0262328.s001.pdf [file pone.0262328.s001.pdf]
