# Supplementary material for: Prickle isoform participation in distinct polarization events in the Drosophila eye
Source: PubMed Central journal article supplement (PMC8836327; doi:10.1371/journal.pone.0262328), 2022-02-11

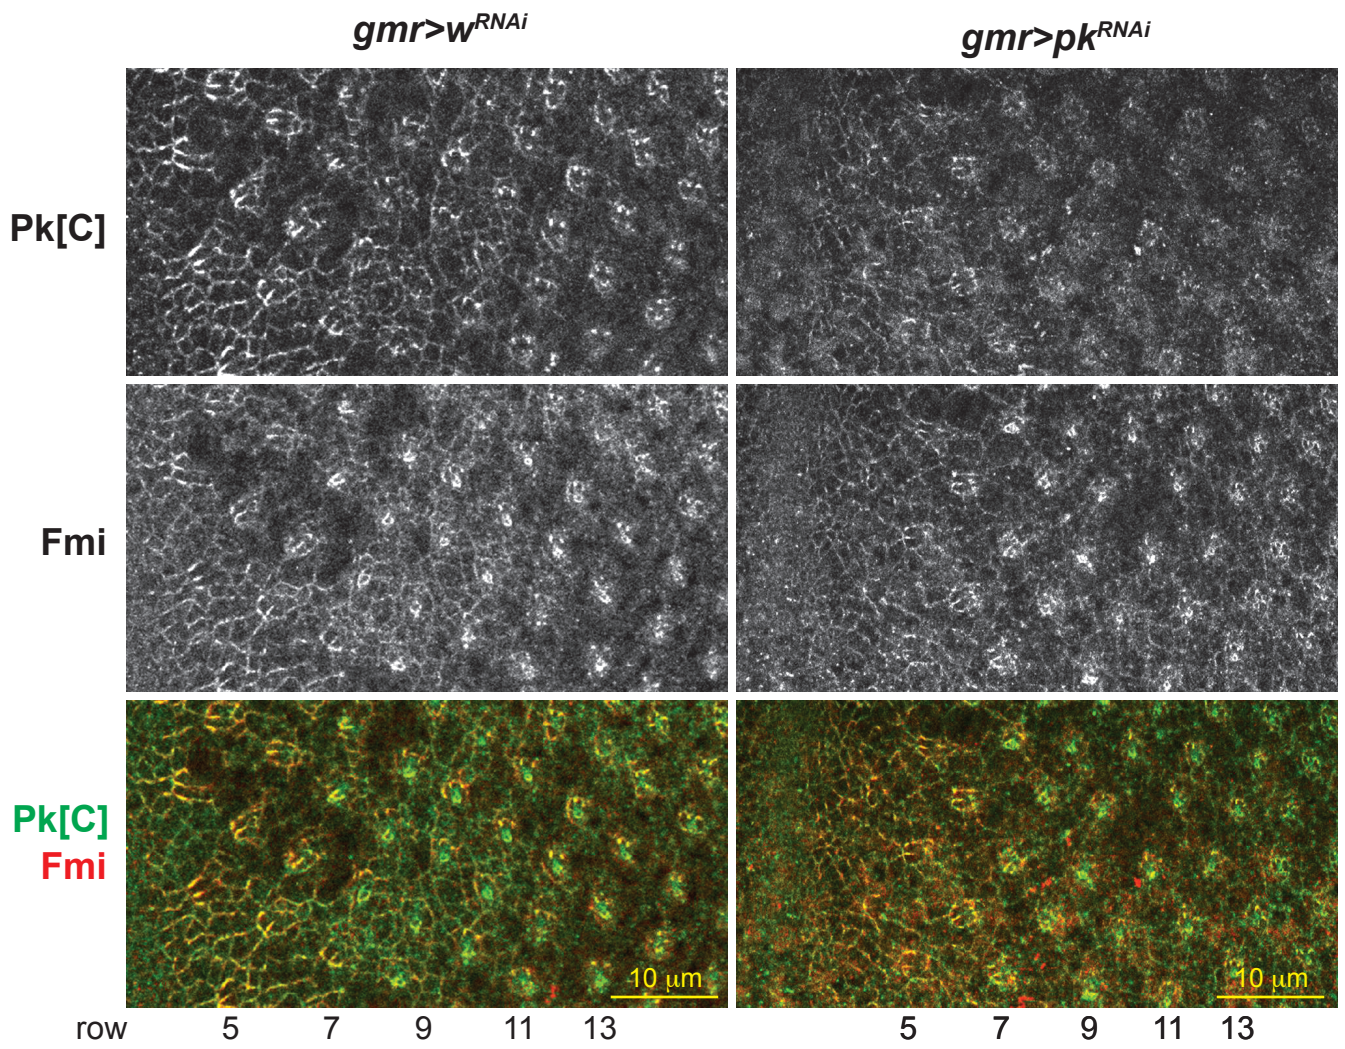

Supplement: pone.0262328.s006.pdf [file pone.0262328.s006.pdf]
