# Supplementary material for: Prickle isoform participation in distinct polarization events in the Drosophila eye
Source: PubMed Central journal article supplement (PMC8836327; doi:10.1371/journal.pone.0262328), 2022-02-11

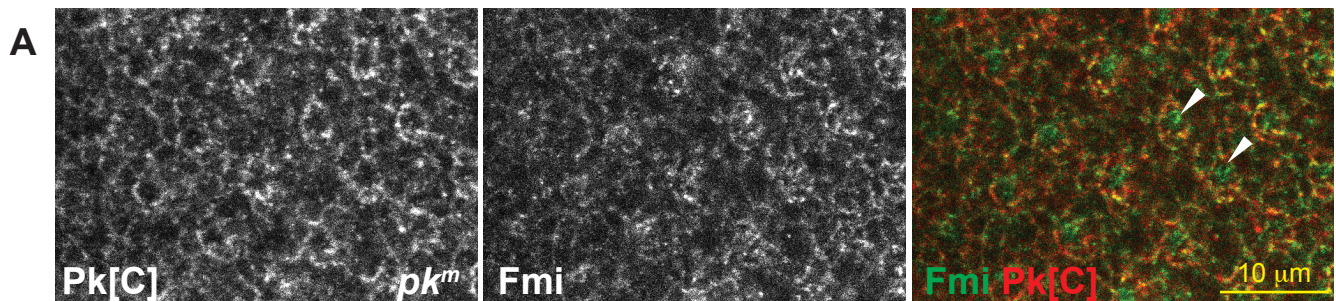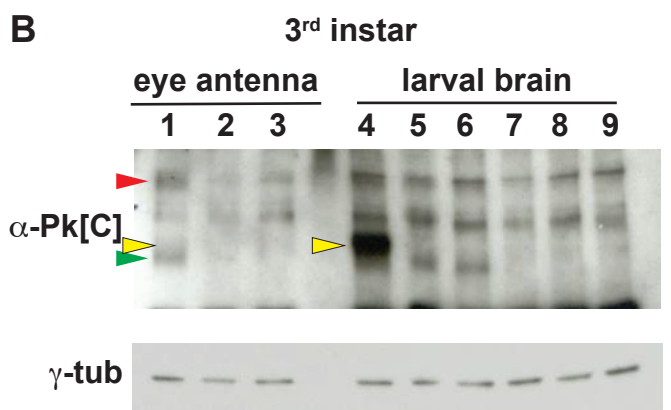

- ▶ Pk<sup>sple</sup> 1: *w<sup>1118</sup>*
- ▶ Pk<sup>pk</sup> 2: *pk<sup>pk-sple-CRISPR</sup>/pk<sup>pk-sple-CRISPR</sup> #2*
- ▶ Pk<sup>m</sup> 3: *pk<sup>pk-sple-CRISPR</sup>/pk<sup>pk-sple-CRISPR</sup> #5*
  
- 4: *w<sup>1118</sup>*
- 5: *pk<sup>m-CRISPR</sup>/pk<sup>m-CRISPR</sup> #2*
- 6: *pk<sup>m-CRISPR</sup>/pk<sup>m-CRISPR</sup> #7*
- 7: *pk<sup>pk-sple-CRISPR</sup>/pk<sup>pk-sple-CRISPR</sup> #2*
- 8: *pk<sup>pk-sple-CRISPR</sup>/pk<sup>pk-sple-CRISPR</sup> #5*
- 9: *pk<sup>pk-sple13</sup>/pk<sup>pk-sple13</sup>*

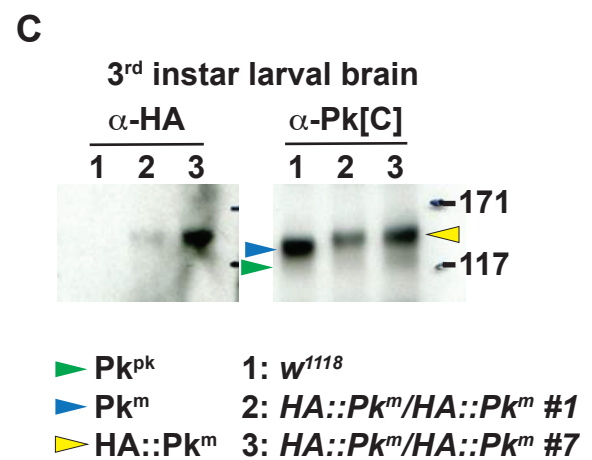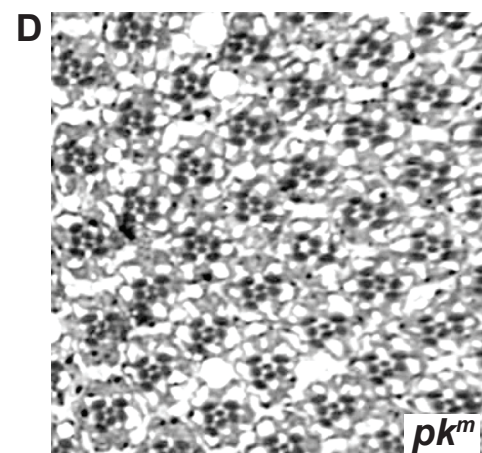

Supplement: pone.0262328.s008.pdf [file pone.0262328.s008.pdf]
